# Supplementary material for: Transcriptional Readthrough Interrupts Boundary Function in Drosophila
Source: MDPI journal article supplement (doi:10.3390/ijms241411368), 2023-07-12
Supplement: s1 [file s1]

## Supporting information

**SI Table S1.** Primers for generating fragments

| <b>Fragments</b>          | <b>Primers</b> | <b>5' - 3'</b>            |
|---------------------------|----------------|---------------------------|
| <b>scs</b>                | scs d          | CGCTGCGAACTTCTCTTC        |
|                           | scs r          | CTGTATTCCTCAGTTATCGA      |
| <b>scs<sup>min</sup></b>  | scs m d        | CGTCCGCATACGTCCG          |
|                           | scs r          | CTGTATTCCTCAGTTATCGA      |
| <b>F7 HS3</b>             | HS3 d          | GTCGCAAGAACTTCACAACAG     |
|                           | HS3 r          | GCCATCATGGATGTGAAAGA      |
| <b>PAS (sv40)</b>         | sv40tr         | GATACATTGATGAGTTTGG       |
|                           | sv40td         | GGATCTTTGTGAAGGAACCTTAC   |
| <b>5'P</b>                | 1147           | CATGATGAAATAACATAAGGTGGTC |
|                           | 1152           | GCTGCTGCTCTAAACGACG       |
| <b>F7<sup>1+2+3</sup></b> | F7-1           | GATTTC AAGCTGTGTGGCGGGG   |
|                           | F7-3           | ATGTCGGCAATTCGGATTCCCGG   |
| <b>F2 pHS2</b>            | F2-47          | TTTGTGAATCCGTACCC         |
|                           | F2-48          | TGAGCGAGTCCTTGAG          |
| <b>F2</b>                 | F2D            | GCTGAGGCGGCTGAGAAAG       |
|                           | F2R            | CAAGATACAATCAGCAAAGC      |
